# Supplementary material for: Capturing temporal heterogeneity in soil nitrous oxide fluxes with a robust and low-cost automated chamber apparatus
Source: Copernicus journal article supplement (doi:10.5194/amt-13-4065-2020), 2020-07-29
Supplement: Supplementary file 1 [file amt-13-4065-2020-supplement.pdf]

Supplement of Atmos. Meas. Tech., 13, 4065–4078, 2020  
<https://doi.org/10.5194/amt-13-4065-2020-supplement>  
© Author(s) 2020. This work is distributed under  
the Creative Commons Attribution 4.0 License.

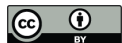

*Supplement of*

## **Capturing temporal heterogeneity in soil nitrous oxide fluxes with a robust and low-cost automated chamber apparatus**

**Nathaniel C. Lawrence and Steven J. Hall**

*Correspondence to:* Steven J. Hall ([stevenjh@iastate.edu](mailto:stevenjh@iastate.edu))

The copyright of individual parts of the supplement might differ from the CC BY 4.0 License.

**Table S1:** Table with the list of primary parts needed to construct the autochambers and control system described in the main manuscript.

| Part Name                                    | Purpose                                                | Supplier                           | Company Location     | Part #    | Total Cost (for 9 chambers) | Chamber | Instrument Shed | Notes                         |
|----------------------------------------------|--------------------------------------------------------|------------------------------------|----------------------|-----------|-----------------------------|---------|-----------------|-------------------------------|
| 2.54 cm x 7.62 cm (1" x 3" nominal) HDPE bar | Chamber base (Fig3a)                                   | McMaster-Carr Supply Company       | Elmhurst, IL, USA    | 8671K63   | 254                         | x       |                 |                               |
| Custom Aluminum L-Brackets                   | Mount lid to frame (Fig3b)                             | W. W. Grainger Inc.                | Lake Forest, IL, USA | 2EYW8     | 52                          | x       |                 | Subsequent machining required |
| Spherical Rod Ends                           | Attach lid pivot point to frame (Fig3b)                | McMaster-Carr Supply Company       | Elmhurst, IL, USA    | 60645K13  | 61                          | x       |                 |                               |
| 0.64 cm threaded rod                         | Pivot point/structure for lid (Fig3c)                  | McMaster-Carr Supply Company       | Elmhurst, IL, USA    | 98804A112 | 89                          | x       |                 |                               |
| 0.95 cm stainless tubing                     | Lid structure (Fig3, 1-5)                              | W. W. Grainger Inc.                | Lake Forest, IL, USA | 3ADE9     | 209                         | x       |                 |                               |
| Aluminum angle brackets (lid)                | Fig3, red circles                                      | W. W. Grainger Inc.                | Lake Forest, IL, USA | 2EYN4     | 7                           | x       |                 |                               |
| 1.27 cm stainless tubing                     | Provide additional rigidity around the threaded rod    | W. W. Grainger Inc.                | Lake Forest, IL, USA | 4VMR6     | 50                          | x       |                 |                               |
| 5.98x2.04 cm HDPE bar                        | Connect piston and threaded rod (Fig3d, yellow circle) | McMaster-Carr Supply Company       | Elmhurst, IL, USA    | 8671K38   | 253                         | x       |                 |                               |
| Cylinder Rod Piston                          | Move lid up/down                                       | Clippard Instrument Laboratory Inc | Cincinnati, OH, USA  | UDR-17-6  | 333                         | x       |                 |                               |
| Feet to connect piston to base               | Move lid up/down                                       | Clippard Instrument Laboratory Inc | Cincinnati, OH, USA  | CB-1795   | 32                          | x       |                 |                               |
| Piston Spherical Rod End                     | Move lid up/down                                       | Clippard Instrument Laboratory Inc | Cincinnati, OH, USA  | RE-1785   | 76                          | x       |                 |                               |

| <b>Part Name</b>                             | <b>Purpose</b>                                                                                    | <b>Supplier</b>                | <b>Company Location</b> | <b>Part #</b> | <b>Total Cost (for 9 chambers)</b> | <b>Chamber</b> | <b>Instrument Shed</b> | <b>Notes</b>                  |
|----------------------------------------------|---------------------------------------------------------------------------------------------------|--------------------------------|-------------------------|---------------|------------------------------------|----------------|------------------------|-------------------------------|
| 1.27 cm HDPE Sheet (lid)                     | Chamber lid (under red circles, Fig3)                                                             | McMaster-Carr Supply Company   | Elmhurst, IL, USA       | 8619K477      | 246                                | x              |                        |                               |
| Custom Inlet Tube Barstock                   | Control inlet flow; Fig2a                                                                         | W. W. Grainger Inc.            | Lake Forest, IL, USA    | 2EYK7         | 77                                 | x              |                        | Subsequent machining required |
| 10.16 cm dia. PVC tube                       | Protective cover for inlet tube                                                                   | Local Hardware Supply          |                         |               | 17                                 | x              |                        |                               |
| 0.64 cm HDPE Sheet (cap)                     | Protective cover for inlet tube                                                                   | McMaster-Carr Supply Company   | Elmhurst, IL, USA       | 8619K467      | 80                                 | x              |                        |                               |
| 1 cm spacers                                 | Elevate protective cover for inlet above the main chamber lid to enable gas movement              | McMaster-Carr Supply Company   | Elmhurst, IL, USA       | 92510A624     | 36                                 | x              |                        |                               |
| 2.54 cm D-Shaped Rubber Seal                 | Seal lid to collar in soil                                                                        | McMaster-Carr Supply Company   | Elmhurst, IL, USA       | 1129A987      | 225                                | x              |                        |                               |
| Slotted Steel Construction Strut             | Provide additional mass at front of lid to ensure tight seal of lid on collar                     | Local Hardware Supply          |                         |               | 117                                | x              |                        |                               |
| 6.4 mm (1/4" nominal) OD polyethylene tubing | Chamber outlet gas sampler (mounted inside chamber lid); perforate at regular intervals           | Cole-Parmer Instrument Company | Vernon Hills, IL, USA   | EW-06490-15   | 72                                 | x              |                        |                               |
| Stainless Eyebolt                            | Suspend perforated chamber outlet manifold sampling tube below the lid                            | W. W. Grainger Inc.            | Lake Forest, IL, USA    | 5ZE79         | 27                                 | x              |                        |                               |
| 0.64 cm brass tube union fitting             | Connect 1/4" nominal gas tubing lengths                                                           | Swagelok Company               | Solon, OH, USA          | B-400-6       | 270                                | x              |                        |                               |
| 0.64 cm bulkhead union                       | Connect gas transport tubing outside the chamber to perforated sampling tubing inside the chamber | Swagelok Company               | Solon, OH, USA          | B-400-61      | 63                                 | x              |                        |                               |
| 0.64 cm union tee                            | Connect gas transport tubing outside the chamber to perforated sampling tubing inside the chamber | Swagelok Company               | Solon, OH, USA          | B-400-3       | 90                                 | x              |                        |                               |
| 30.48 cm PVC collars                         | Collar for inserting into the soil                                                                | Local Hardware Supply          |                         |               | 100                                | x              |                        |                               |

| Part Name                                           | Purpose                                                           | Supplier                           | Company Location      | Part #      | Total Cost (for 9 chambers) | Chamber | Instrument Shed | Notes |
|-----------------------------------------------------|-------------------------------------------------------------------|------------------------------------|-----------------------|-------------|-----------------------------|---------|-----------------|-------|
| Pall 1 µm filters (.32 cm MNPT)                     | Prevent water / debris from entering gas sampling tubes           | VWR International                  | Radnor, PA, USA       | 16003-654   | 828                         | x       | x               |       |
| 0.32 FNPT x 0.64 tube fitting                       | Connect filters to tubing                                         | Swagelok Company                   | Solon, OH, USA        | B-200-7-4   | 200                         | x       |                 |       |
| 1.27 cm steel rebar                                 | Secure chamber base to soil                                       | Local Hardware Supply              |                       |             | 36                          | x       |                 |       |
| 2.54 cm x 6.35 cm U-bolt                            | Secure chamber base to soil                                       | W. W. Grainger Inc.                | Lake Forest, IL, USA  | 1RCK8       | 27                          | x       |                 |       |
| 0.64 cm LDPE plastic tubing                         | Connect chamber inlet and outlet to the gas measurement apparatus | United States Plastic Corp.        | Lima, OH, USA         | 58097       | 708                         | x       |                 |       |
| Assorted screws and nuts/bolts for chamber assembly | Assemble chamber frame and mount lid to frame                     | Local Hardware Supply              |                       |             | 100                         | x       |                 |       |
| Clippard Needle Valves                              | Control rate of chamber opening/closure                           | Clippard Instrument Laboratory Inc | Cincinnati, OH, USA   | JFC-2A      | 342                         | x       |                 |       |
| 1/8 NPT to 1/4 tube                                 | Connect tubing to cylinder piston for pneumatic chamber operation | Swagelok Company                   | Solon, OH, USA        | B-400-1-2   | 110                         | x       | x               |       |
| Gast 12 VDC oil-less compressor                     | Pressurize air for chamber opening/closure (pneumatic)            | Cole-Parmer Instrument Company     | Vernon Hills, IL, USA | UX-07055-60 | 882                         |         | x               |       |
| Condor MDR3 compressor switch                       | Turn on/shut off compressor at desired pressure                   | W. W. Grainger Inc.                | Lake Forest, IL, USA  | 3FWN3       | 158                         |         | x               |       |
| 0.635 cm x 15.24 m flexible copper tubing           | Allow air to cool and moisture to condense follow compression     | W. W. Grainger Inc.                | Lake Forest, IL, USA  | 3P669       | 34                          |         | x               |       |
| Speedaire compressed air filter                     | Filter compressed air and remove water                            | W. W. Grainger Inc.                | Lake Forest, IL, USA  | 4ZL49       | 103                         |         | x               |       |
| Manifold for four-channel valves                    | Control pneumatic opening/closing of chambers                     | Clippard Instrument Laboratory Inc | Cincinnati, OH, USA   | MMM-41-06   | 89                          |         | x               |       |

| <b>Part Name</b>                   | <b>Purpose</b>                                        | <b>Supplier</b>                    | <b>Company Location</b>       | <b>Part #</b>   | <b>Total Cost (for 9 chambers)</b> | <b>Chamber</b> | <b>Instrument Shed</b> | <b>Notes</b> |
|------------------------------------|-------------------------------------------------------|------------------------------------|-------------------------------|-----------------|------------------------------------|----------------|------------------------|--------------|
| Four-channel, two-way valves       | Control pneumatic opening/closing of chambers         | Clippard Instrument Laboratory Inc | Cincinnati, OH, USA           | MME-41PEEC-W012 | 87                                 |                | x                      |              |
| Plate for extra four-channel ports | Control pneumatic opening/closing of chambers         | Clippard Instrument Laboratory Inc | Cincinnati, OH, USA           | MMM-41-B        | 20                                 |                | x                      |              |
| 12 V, 16 channel relay controller  | Control valves for gas sampling and chamber operation | Campbell Scientific                | Logan, UT, USA                | SDM-CD16AC      | 816                                |                | x                      |              |
| Manifold for Solenoid Valves       | Control gas sample flow                               | Clippard Instrument Laboratory Inc | Cincinnati, OH, USA           | 15781-4         | 121                                |                | x                      |              |
| Solenoid Valves                    | Control gas sample flow                               | Clippard Instrument Laboratory Inc | Cincinnati, OH, USA           | DV-2M-12-L      | 406                                |                | x                      |              |
| Plugs for extra manifold ports     | Control gas sample flow                               | Clippard Instrument Laboratory Inc | Cincinnati, OH, USA           | 0035-2-PKG      | 7                                  |                | x                      |              |
| Aalborg Mass flow controllers      | Control gas sample flow                               | Aalborg Instruments and Controls   | Aalborg, Denmark              | GFCS-010201     | 2685                               |                | x                      |              |
| Diaphragm Gas Pumps                | Sample inlet/outlet gas                               | KNF Neuberger Incorporated         | Freiburg im Breisgau, Germany | KNF UNMP830     | 400                                |                | x                      |              |
| 9-pin cable for MFC communication  | Connect MFC to datalogger                             | Aalborg Instruments and Controls   | Aalborg, Denmark              | CBL-D5          | 90                                 |                | x                      |              |
| Vent Needle Valves                 | Control rates of overflow upstream of pumps           | Clippard Instrument Laboratory Inc | Cincinnati, OH, USA           | GNV-4KI         | 90                                 |                | x                      |              |
| Trojan 6V Deep Cycle Battery       | Power the sampling/analysis system                    | Local Industrial                   |                               | J305E-AC 6V     | 4000                               |                | x                      |              |

| Part Name                         | Purpose                                                     | Supplier                                         | Company Location       | Part #     | Total Cost (for 9 chambers) | Chamber | Instrument Shed | Notes |
|-----------------------------------|-------------------------------------------------------------|--------------------------------------------------|------------------------|------------|-----------------------------|---------|-----------------|-------|
| Solar Panels                      | Power the sampling/analysis system                          | Battery Service<br>Kyocera Solar<br>Incorporated | Scottsdale, AZ, USA    | KU265-6MCA | 1110                        |         | x               |       |
| Charge Controller                 | Control the charge from the solar panels                    | Morningstar Corporation                          | Newton, PA, USA        | TS-MPPT-60 | 600                         |         | x               |       |
| DC/AC Converter                   | Convert DC battery voltage to AC for N2O analyzer operation | Samlex Solar                                     | Vancouver, BC, Canada  | PST 600-24 | 220                         |         | x               |       |
| Drossbach Corrugated Loom Tubing  | Protect gas tubing from animal damage                       | W. W. Grainger Inc.                              | Lake Forest, IL, USA   | 25D260     | 832                         | x       |                 |       |
| LI-COR 830 CO2/H2O Vapor Analyzer | Measure CO2 and H2O                                         | LI-COR Biosciences                               | Lincoln, NE, USA       | LI-850     | 4400                        |         | x               |       |
| Teledyne 320U N2O Analyzer        | Measure N2O                                                 | Teledyne Technologies                            | Thousand Oaks, CA, USA | T320u      | 16000                       |         | x               |       |
| Datalogger                        | Measurement and control system                              | Campbell Scientific                              | Logan, UT, USA         | CR3000     | 3042                        |         | x               |       |
| <b>Total:</b>                     |                                                             |                                                  |                        |            | <b>41379</b>                |         |                 |       |
